# Supplementary material for: Variation of the electrocatalytic activity of isostructural oxides Sr2LaFeMnO7 and Sr2LaCoMnO7 for hydrogen and oxygen-evolution reactions
Source: Royal Society of Chemistry journal article supplement (doi:10.1039/d1dt01977e), 2021-01-01
Supplement: d1dt01977e1.pdf [file d1dt01977e1.pdf]

## Supporting Information

### Variation of Electrocatalytic Activity of Isostructural Oxides $\text{Sr}_2\text{LaFeMnO}_7$ and $\text{Sr}_2\text{LaCoMnO}_7$ for Hydrogen and Oxygen-Evolution Reactions

Chandana C.W. Kananke-Gamage<sup>1</sup>, Farshid Ramezanipour<sup>1,\*</sup>

<sup>1</sup>Department of Chemistry, University of Louisville, Louisville, KY 40292, USA

\*Corresponding author. Email: [farshid.ramezanipour@louisville.edu](mailto:farshid.ramezanipour@louisville.edu), Phone: +1(502) 852-7061

ORCID: 0000-0003-4176-1386

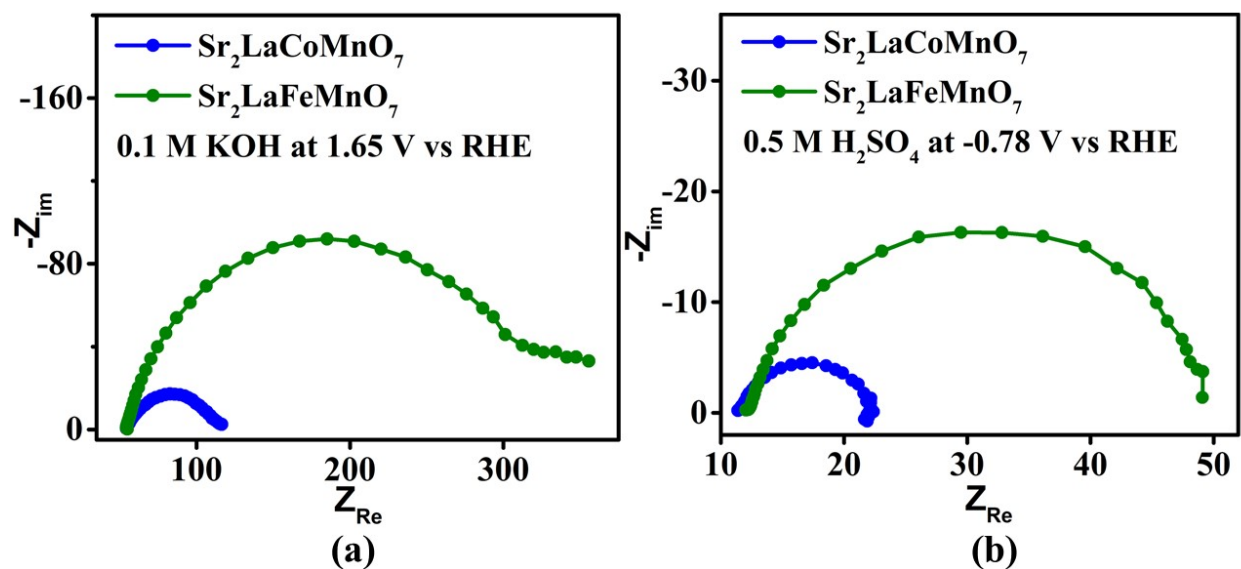

**Figure S1.** Impedance spectroscopy measurements to evaluate charge transfer resistance in (a) OER and (b) HER conditions. In both conditions,  $\text{Sr}_2\text{LaCoMnO}_7$  shows a smaller charge transfer resistance than  $\text{Sr}_2\text{LaFeMnO}_7$ .

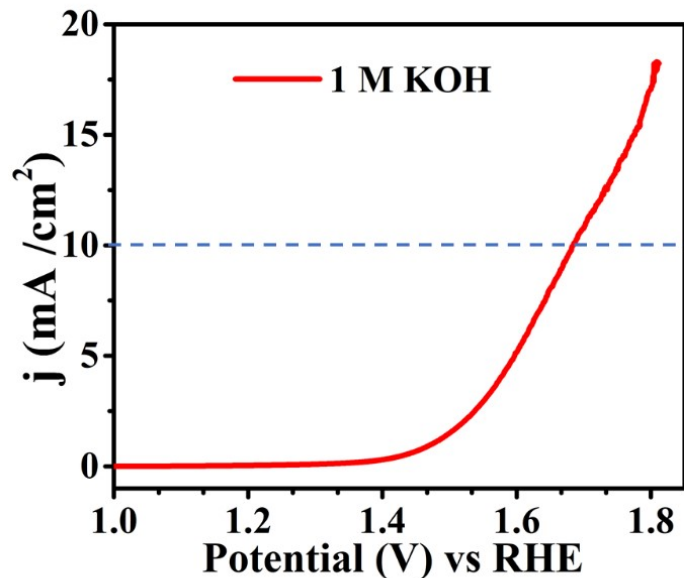

**Figure S2.** OER polarization curves of  $\text{Sr}_2\text{LaCoMnO}_7$  in 1 M KOH, showing overpotential of  $\eta_{10} = 450$  mV.

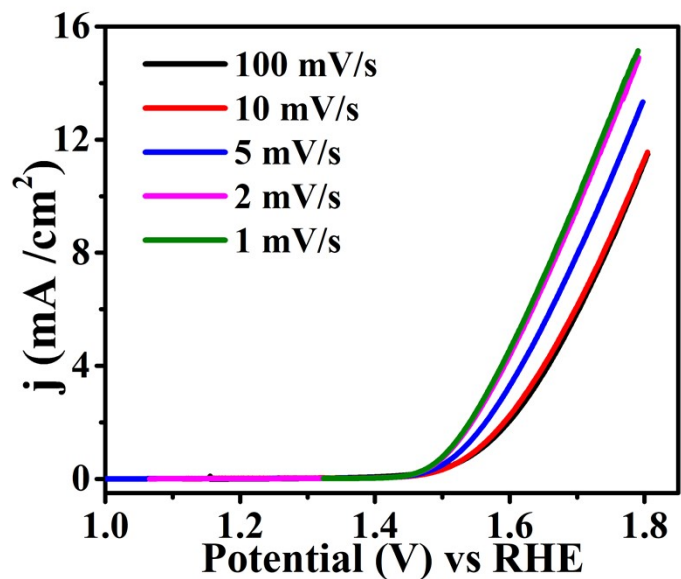

**Figure S3.** OER polarization curves of  $\text{Sr}_2\text{LaCoMnO}_7$  in 0.1 M KOH at different scan rates.

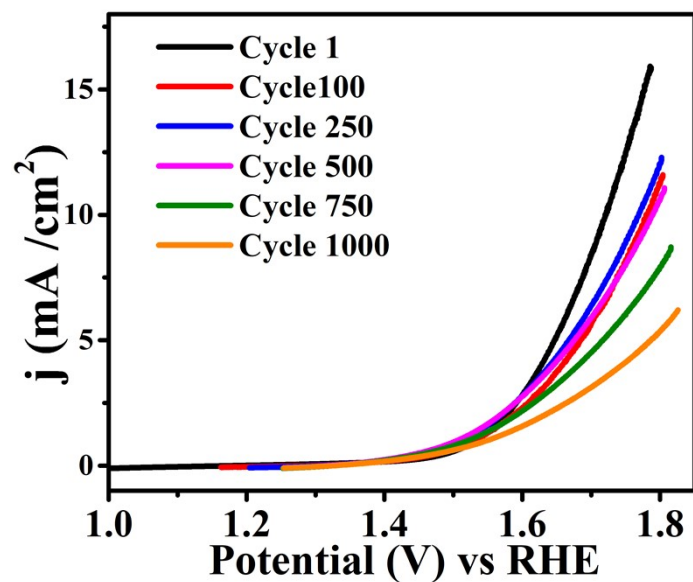

**Figure S4.** OER current-voltage cycles of  $\text{Sr}_2\text{LaCoMnO}_7$  in 0.1 M KOH.

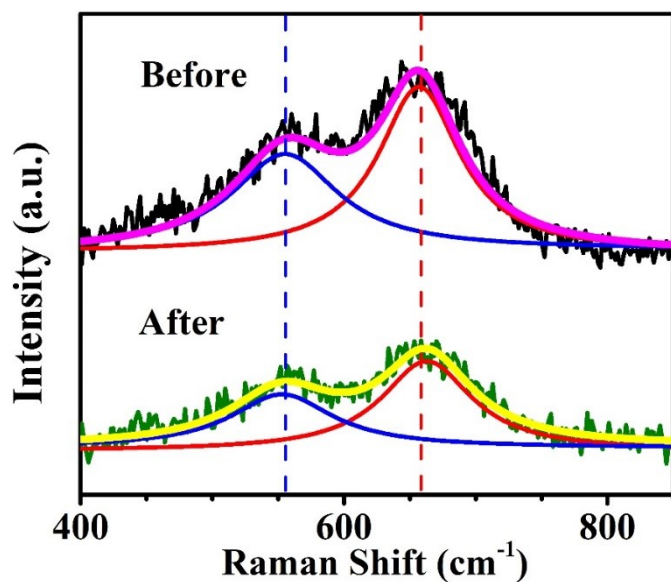

**Figure S5.** Raman spectroscopy data for  $\text{Sr}_2\text{LaCoMnO}_7$  before and after 1000 cycles of OER. Raman shifts for the main bands remain almost the same, indicating the retention of the structural integrity of the catalyst.
